# Supplementary material for: Role of endoplasmic reticulum stress in impaired neonatal lung growth and bronchopulmonary dysplasia
Source: PubMed Central journal article supplement (PMC9417039; doi:10.1371/journal.pone.0269564), 2022-08-26

raw\_Figure 2A

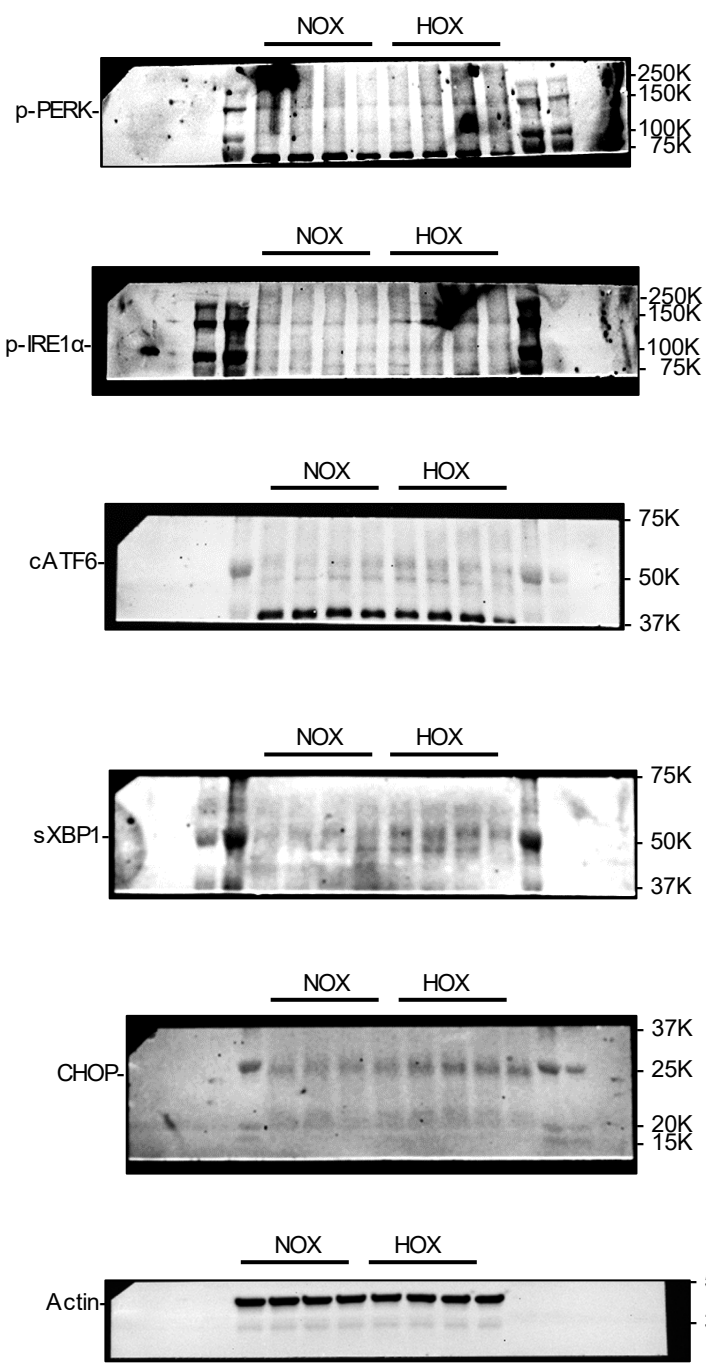

raw\_Figure 3B

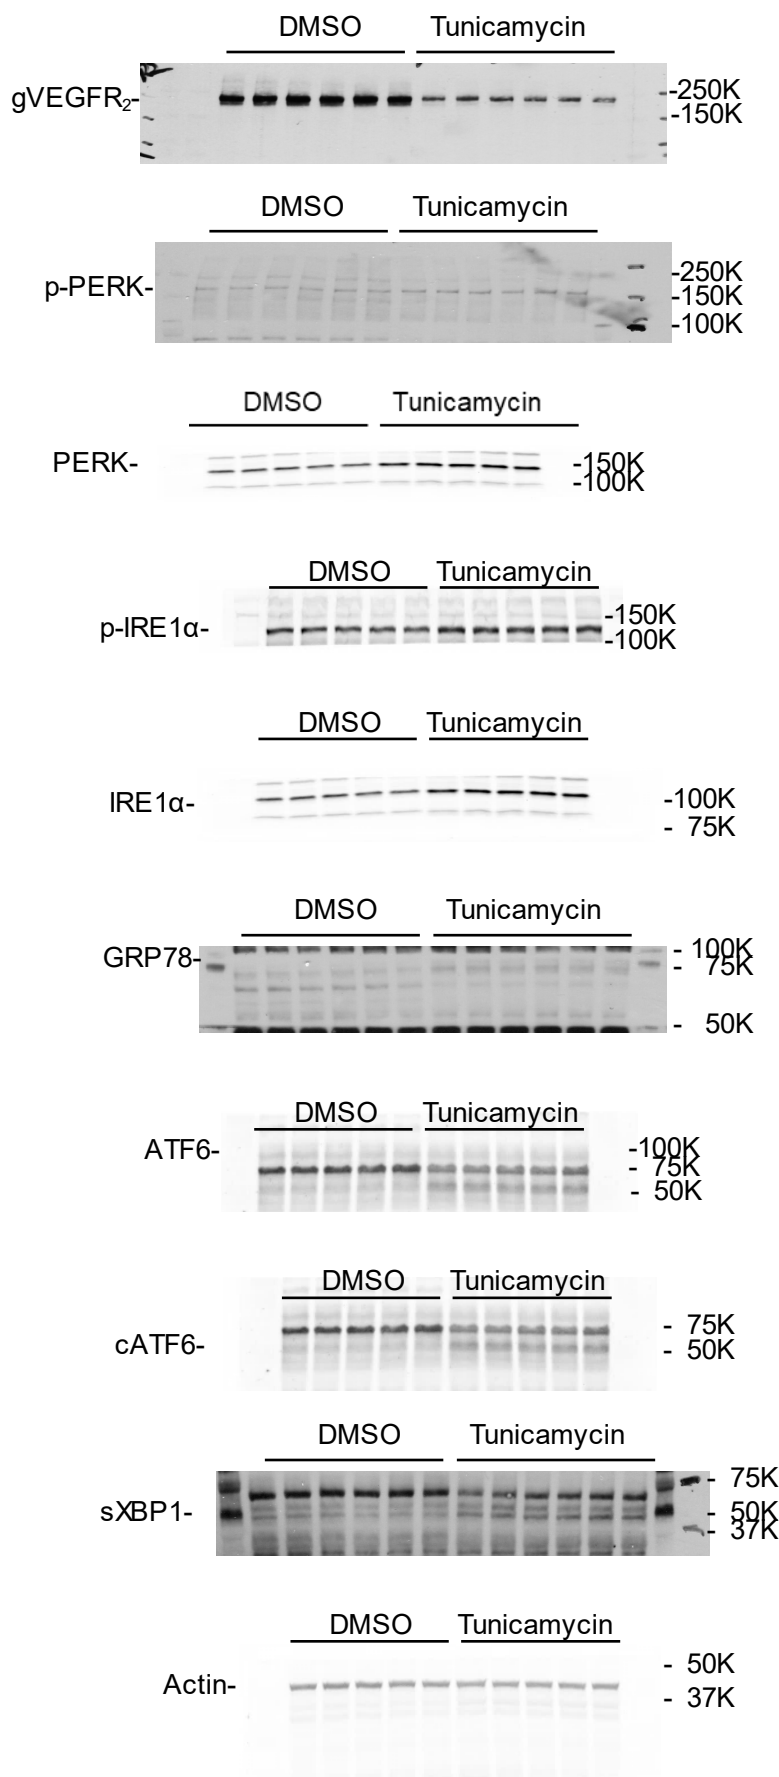

raw\_Figure 3C

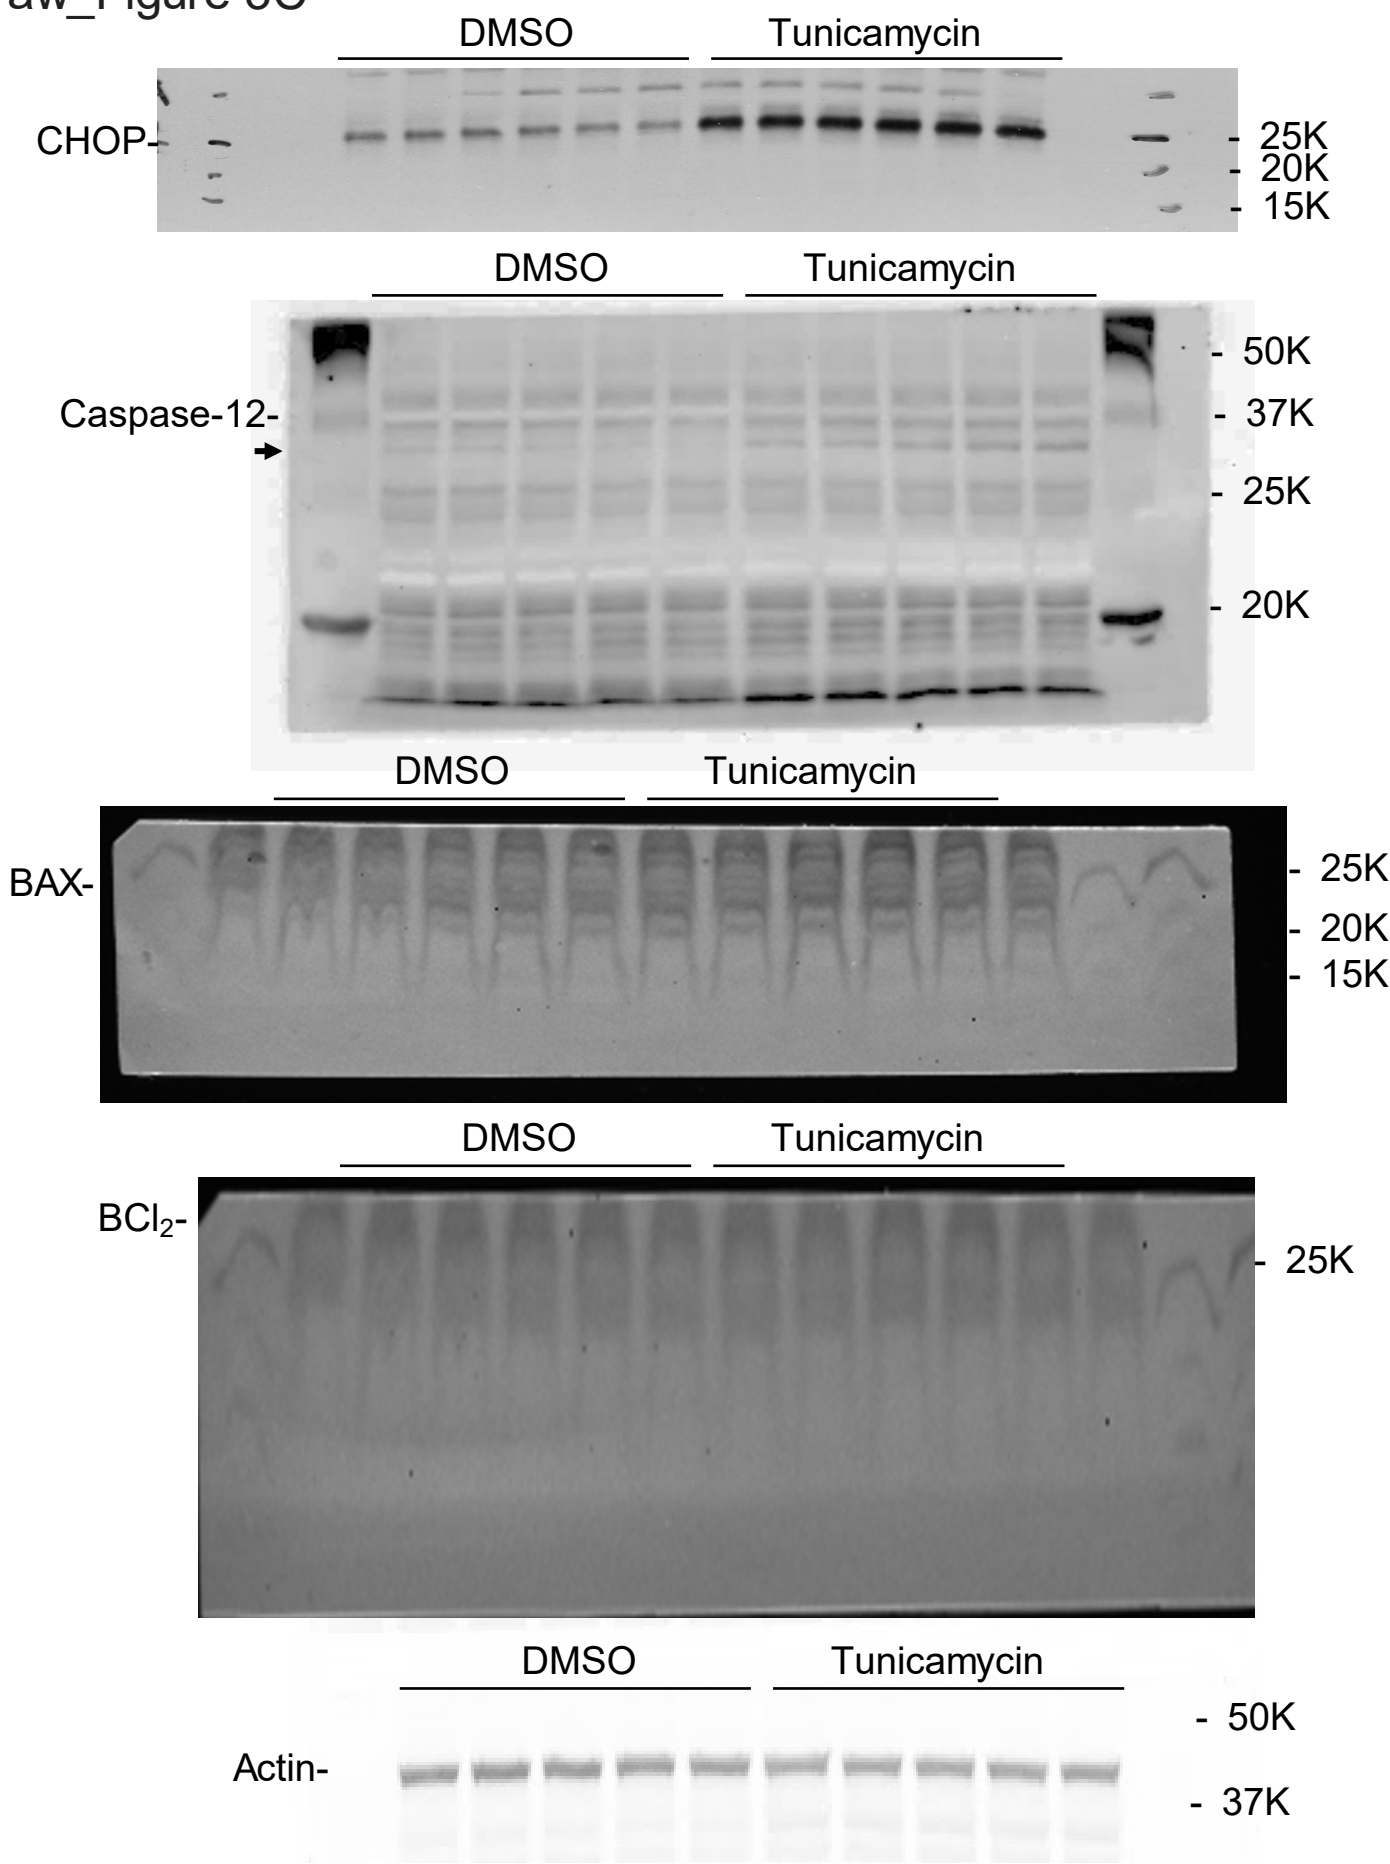

raw\_Figure 4A

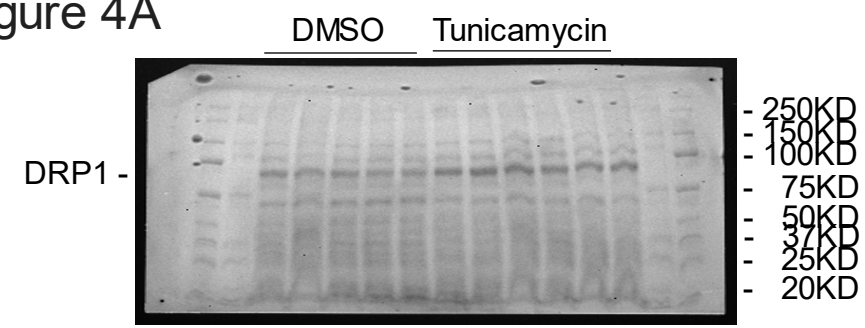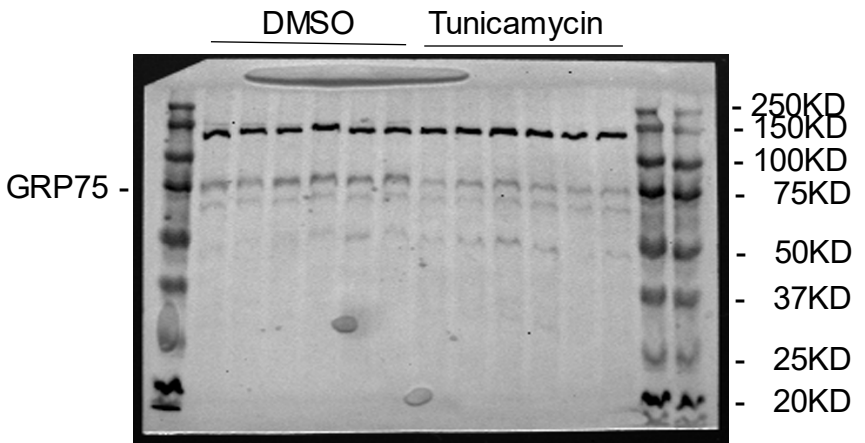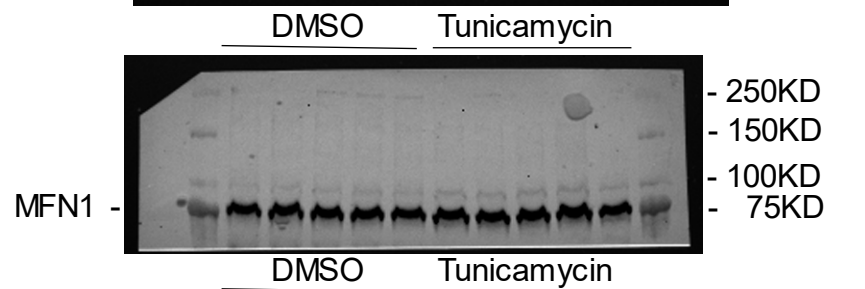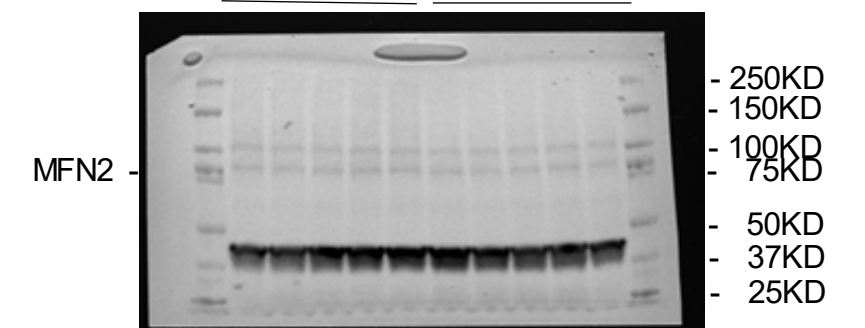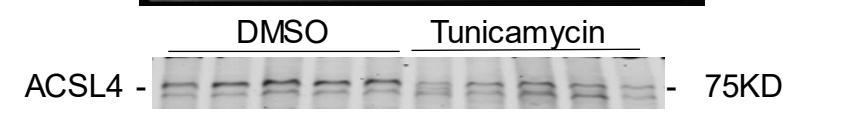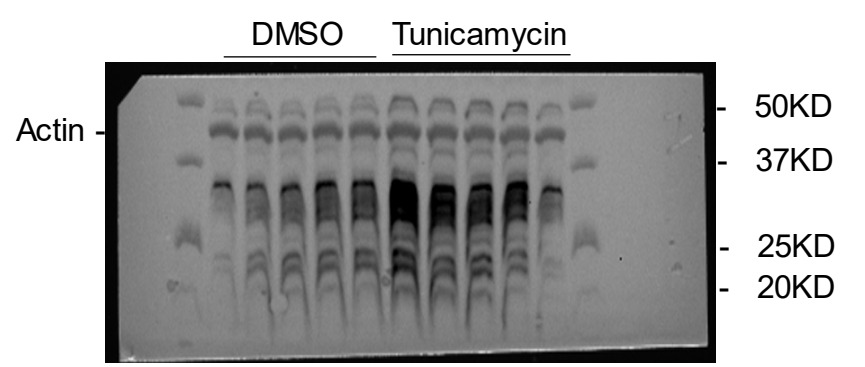

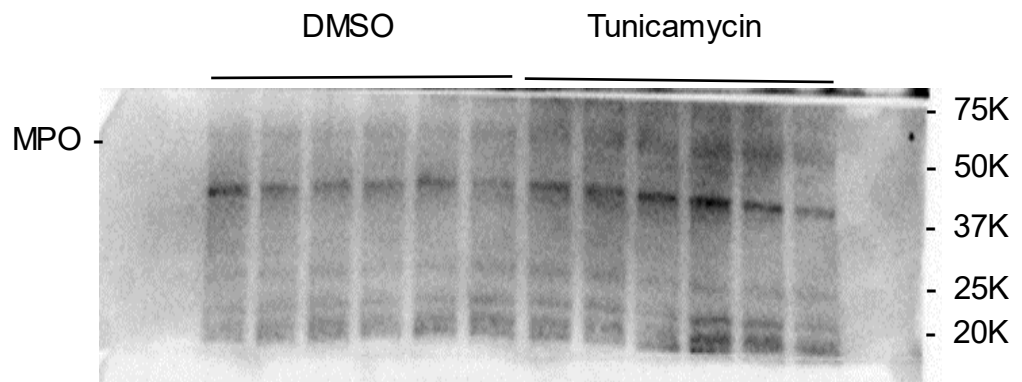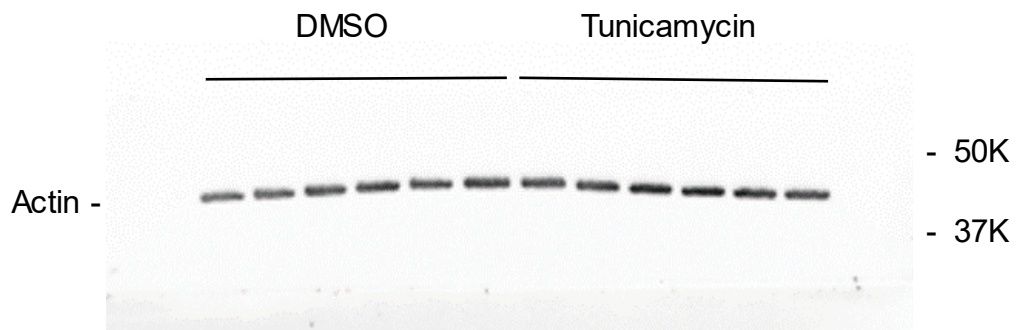

# raw\_Figure 6A

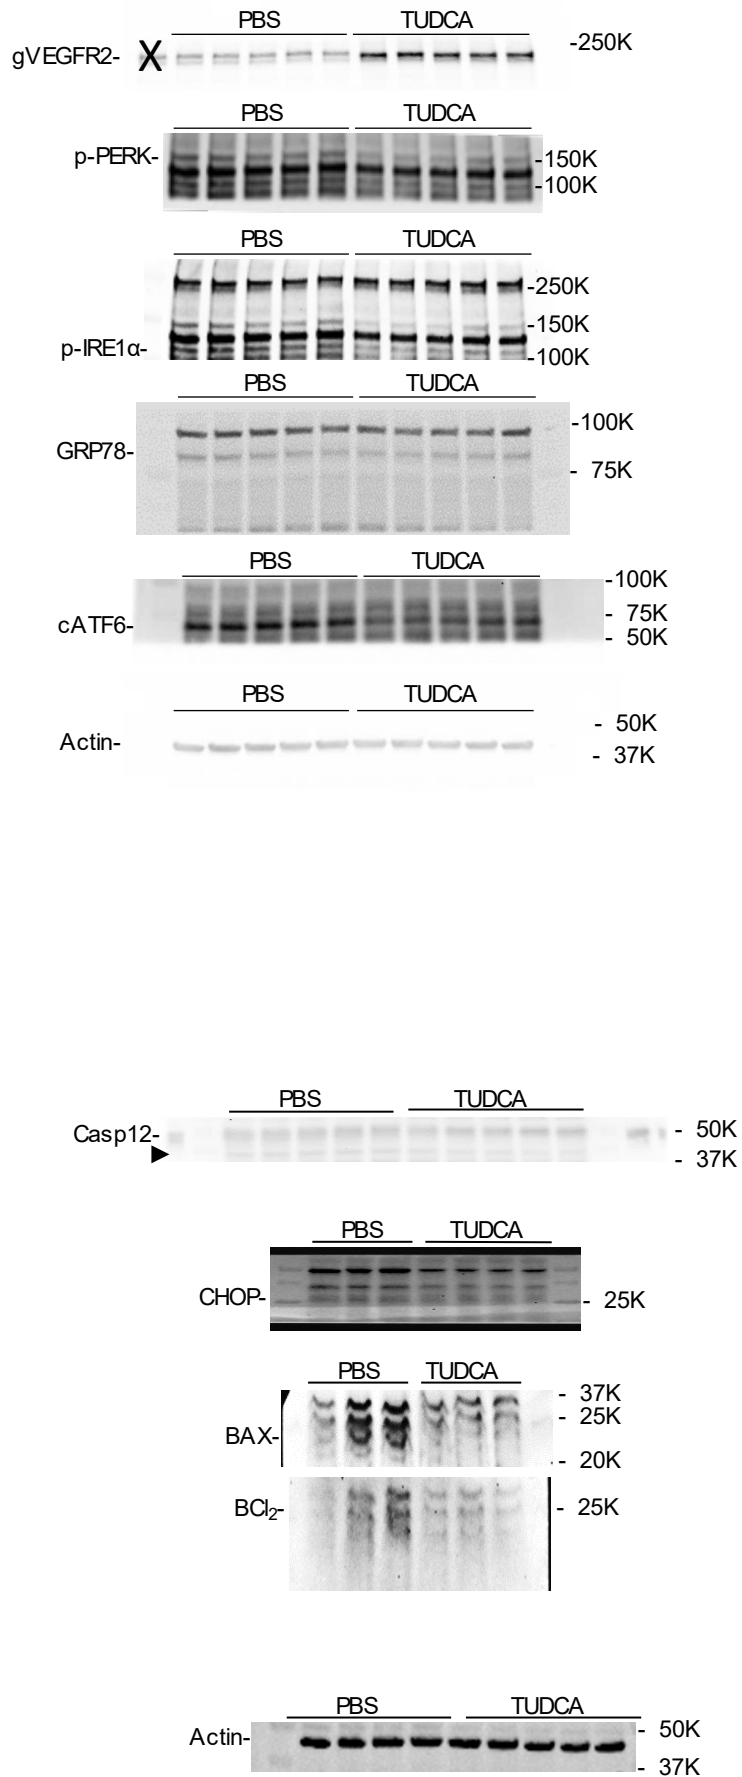

# raw\_Figure 7A

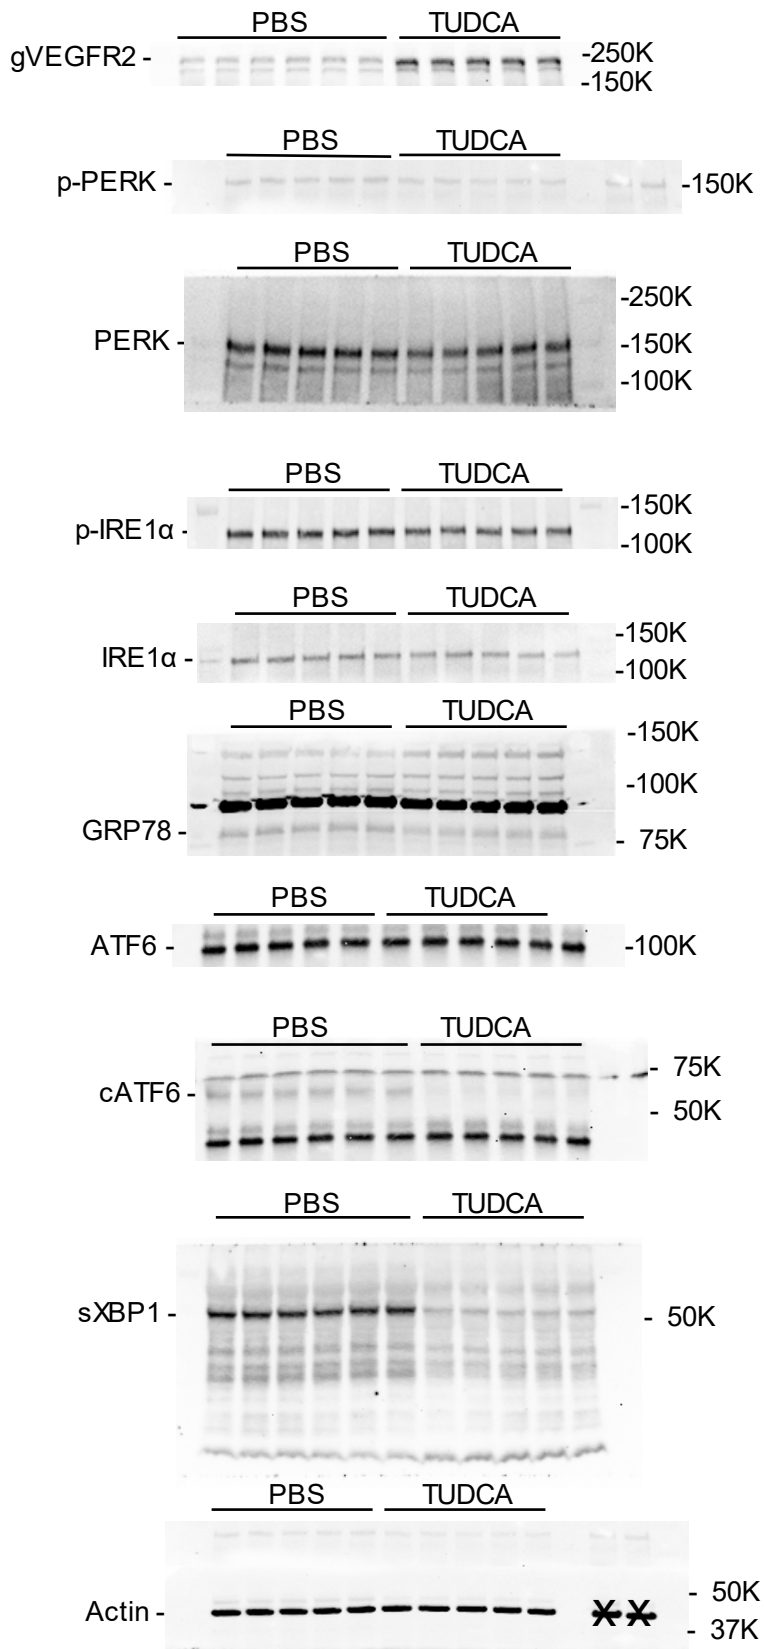

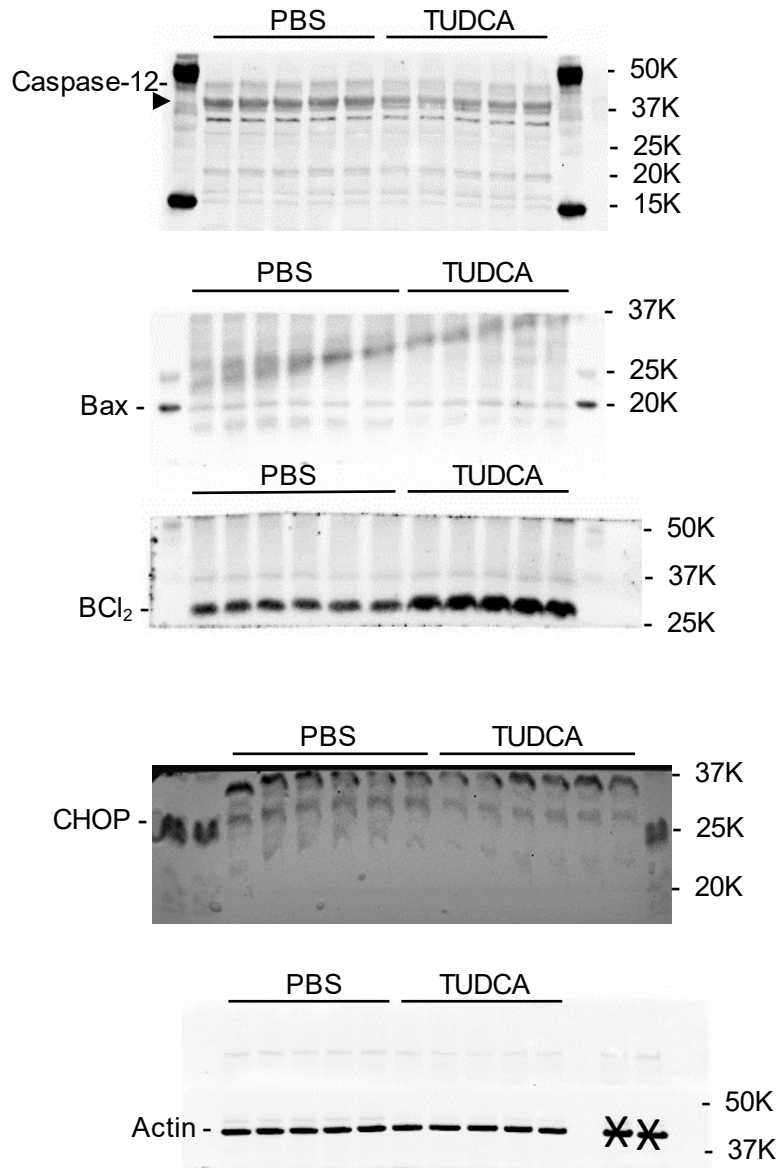



# raw\_Figure 8A

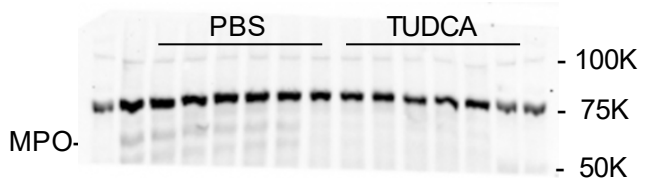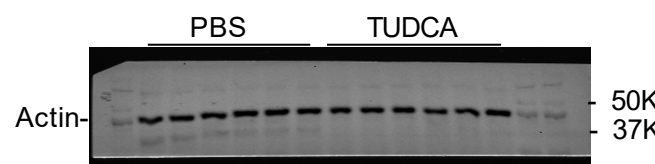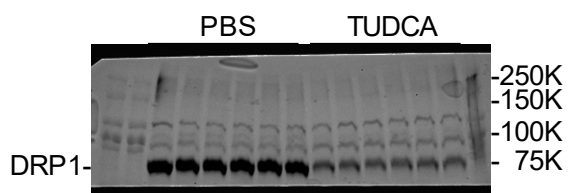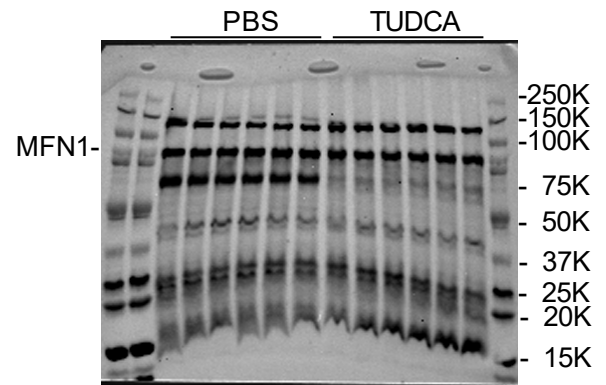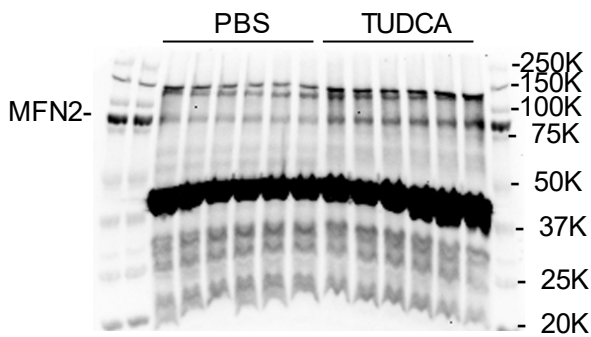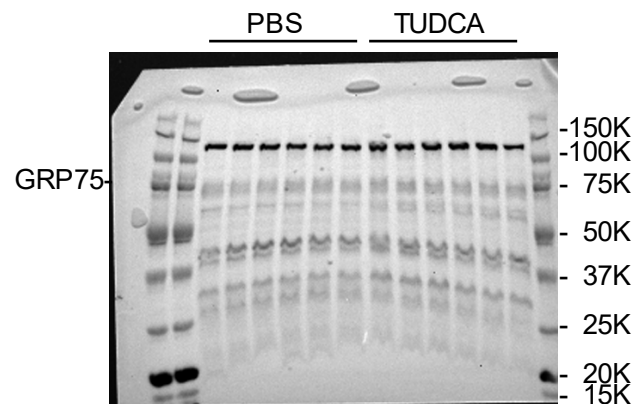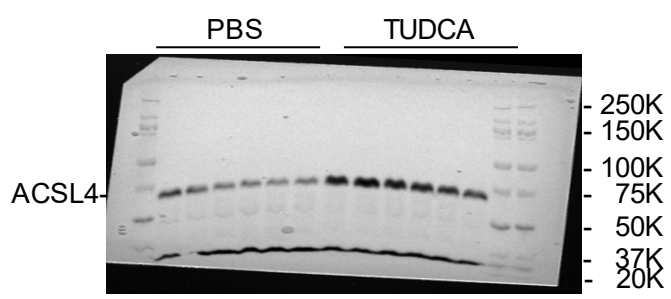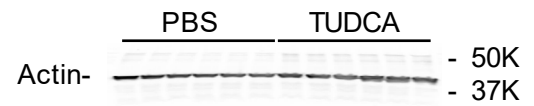

# raw\_Figure 10A

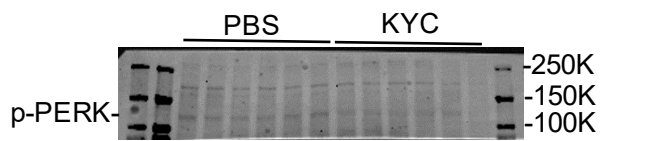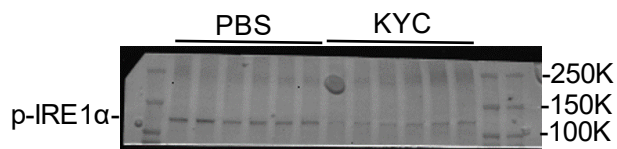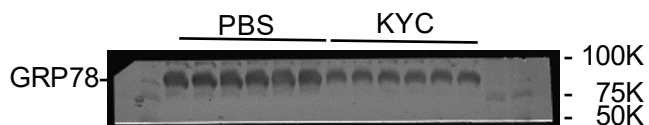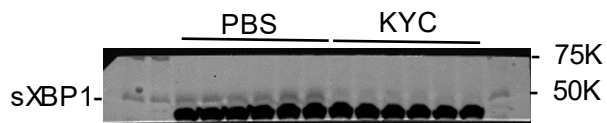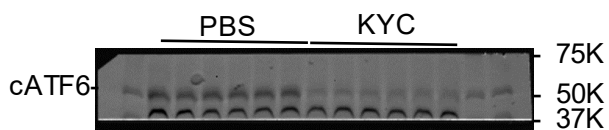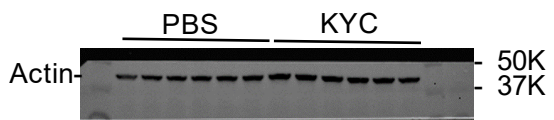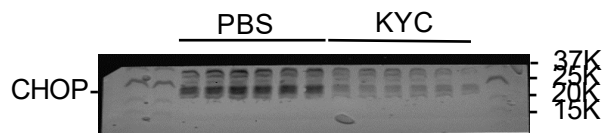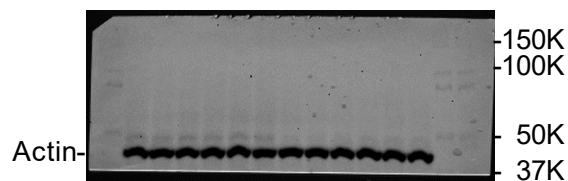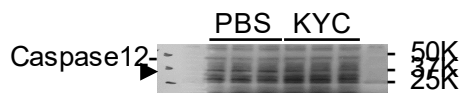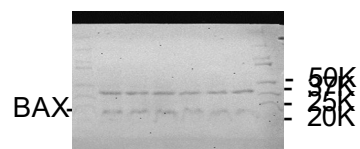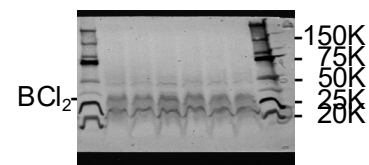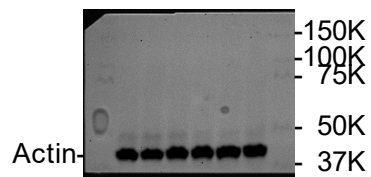

# raw\_Figure 10C

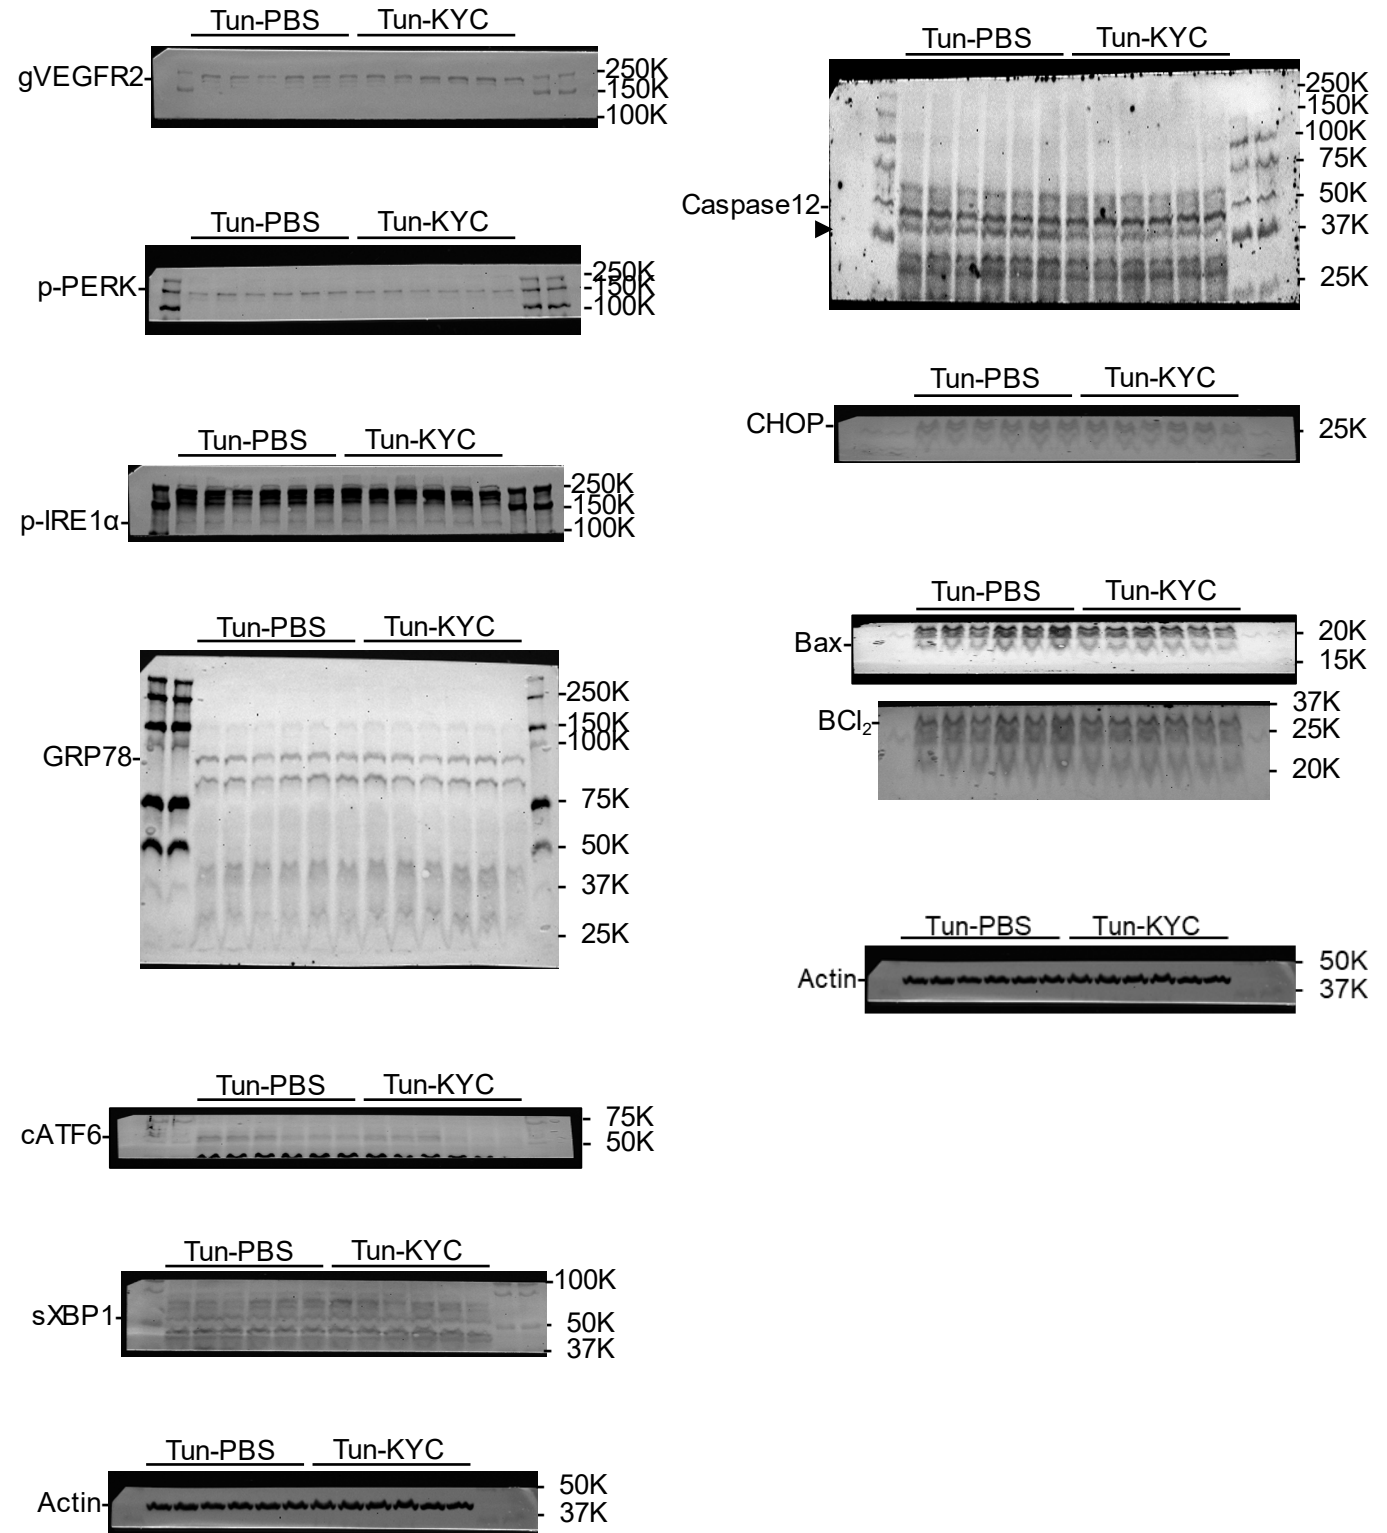

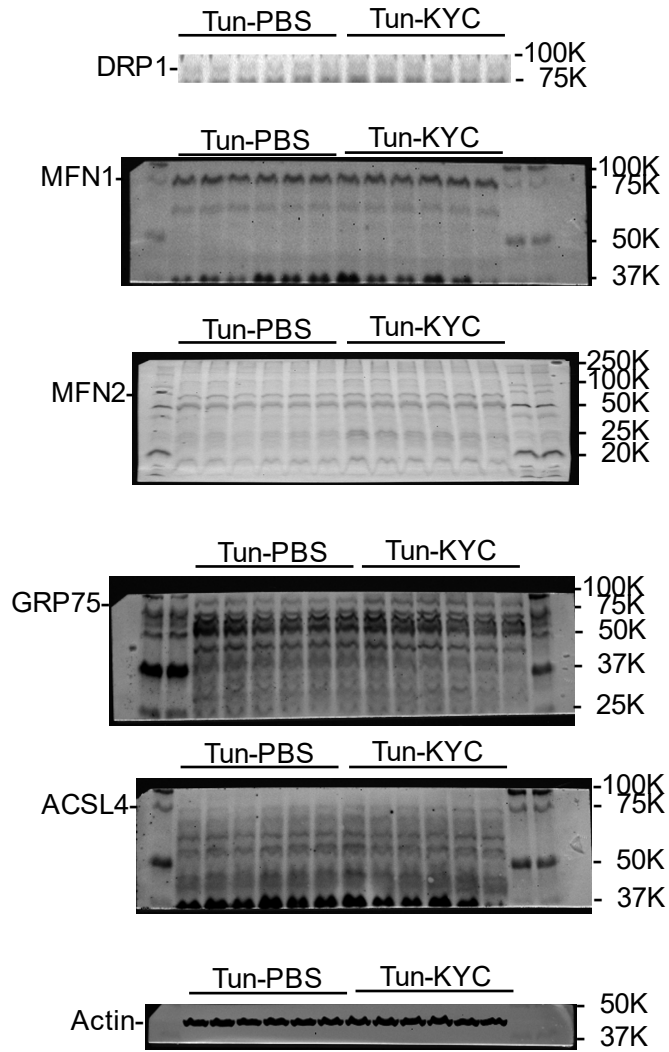

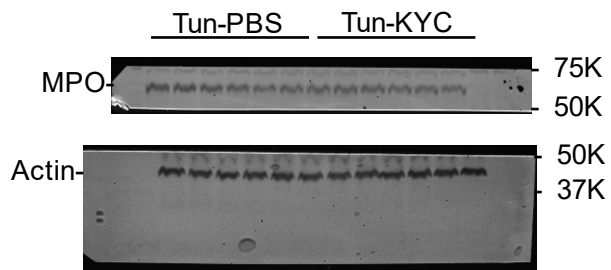

Supplement: pone.0269564.s007.pdf [file pone.0269564.s007.pdf]
