# Supplementary material for: Role of endoplasmic reticulum stress in impaired neonatal lung growth and bronchopulmonary dysplasia
Source: PubMed Central journal article supplement (PMC9417039; doi:10.1371/journal.pone.0269564), 2022-08-26
Supplement: pone.0269564.s005.pdf [file pone.0269564.s005.pdf]

**Table S1.** Age, sex, and diagnosis of the autopsy specimens.

| BPD |     |           | Control |     |                                      |
|-----|-----|-----------|---------|-----|--------------------------------------|
| Age | Sex | Diagnosis | Age     | Sex | Diagnosis                            |
| 5W  | M   | BPD       | 1M      | M   | Wolf-Hirschhorn and renal dysgenesis |
| 11W | F   | BPD       | 5M      | F   | HLHS                                 |
| 10W | M   | BPD       | 10W     | M   | HLHS                                 |
| 3M  | M   | BPD       | 3M      | M   | Congenital heart disease             |
| 8M  | F   | BPD       | 7M      | F   | Liver failure/PFIC                   |
| 4M  | F   | BPD       | 4M      | F   | Congenital heart disease             |
| 5W  | M   | BPD       | 25D     | M   | Hypoxic ischemic encephalopathy      |
| 3M  | M   | BPD       | 3M      | M   | Osteogenesis imperfecta              |
| 7W  | F   | BPD       | 2M      | F   | Congenital heart disease             |
| 16M | M   | BPD       | 13M     | M   | Hemophagocytic lymphohistiocytosis   |

HLHS: hypoplastic left heart syndrome; PFIC: progressive familial intrahepatic cholestasis (Byler disease).
