# Supplementary material for: Role of endoplasmic reticulum stress in impaired neonatal lung growth and bronchopulmonary dysplasia
Source: PubMed Central journal article supplement (PMC9417039; doi:10.1371/journal.pone.0269564), 2022-08-26
Supplement: pone.0269564.s006.pdf [file pone.0269564.s006.pdf]

**Table S2.** Transcriptomes enriched in two NRF2-related pathways as annotated by the ToppCluster using WikiPathways as the data source.

| WikiPathway | Systemic Name       | p-value               | Transcriptomes identified                                                                                                                                                                                                                                                                                                                                                                  |
|-------------|---------------------|-----------------------|--------------------------------------------------------------------------------------------------------------------------------------------------------------------------------------------------------------------------------------------------------------------------------------------------------------------------------------------------------------------------------------------|
| M39761      | NRF2-ARE regulation | 2.82x10 <sup>-6</sup> | AIMP2 CEBPB EPHB2 FYN GCLC GCLM GSK3B HMOX1 INSR NFE2L2 NQO1 PGAM5<br>PRKCARBX1 SLC7A11 SRC                                                                                                                                                                                                                                                                                                |
| M39454      | NRF2 pathway        | 3.60x10 <sup>-6</sup> | BLVRB CES1 DNAJB1 EGR1 EPHA2 FGF13 FTH1 FTL G6PD GCLC GCLM GPX2 GSR<br>GSTA1 GSTA3 GSTM3 GSTM5 GSTP1 HBEGF HMOX1 HSP90AA1 HSP90AB1 HSPA1A<br>MAFF MAFG ME1 MGST2 MGST3 NFE2L2 NQO1 NRG1 PGD PRDX1 PRDX6 PTGR1<br>SLC2A1 SLC2A4 SLC2A9 SLC39A1 SLC39A11 SLC39A14 SLC39A4 SLC39A6 SLC39A8<br>SLC5A3 SLC5A6 SLC6A14 SLC6A15 SLC6A20 SLC7A11 SQSTM1 SRXN1 TGFATGFB1<br>TGFB2 TXN TXNRD1 UGT1A6 |
